# Supplementary material for: Advancing biomass utilization: conversion of solid residues from pretreatment and enzymatic hydrolysis into porous carbon materials
Source: Royal Society of Chemistry journal article supplement (doi:10.1039/d4gc06034b), 2025-01-01
Supplement: d4gc06034b1.pdf [file d4gc06034b1.pdf]

## Supporting information

### Advancing Biomass Utilization: Conversion of Solid Residues from Pretreatment and Enzymatic Hydrolysis into Porous Carbon Materials

Wubliker Dessie,<sup>a, c</sup> Qiao Wang,<sup>a</sup> Xiaofang Luo,<sup>a</sup> Meifeng Wang,<sup>a</sup> Yunhui Liao,<sup>a</sup> Wufei Tang,<sup>a</sup>  
Fulin He,<sup>a</sup> Jianhua Wang,<sup>c</sup> Mohammad Rizwan Khan,<sup>d</sup> Zuodong Qin,<sup>\*a, c</sup> Buxing Han<sup>\*b</sup>

**Corresponding authors:** Prof. Buxing Han, E-mail: [hanbx@iccas.ac.cn](mailto:hanbx@iccas.ac.cn);

Prof. Zuodong Qin, E-mail: [dong6758068@163.com](mailto:dong6758068@163.com)

<sup>a</sup> Hunan Engineering Technology Research Center for Comprehensive Development and Utilization of Biomass Resources, College of Chemistry and Bioengineering, Hunan University of Science and Engineering, Yongzhou 425199, Hunan, China

<sup>b</sup> Beijing National Laboratory for Molecular Sciences, CAS Laboratory of Colloid and Interface and Thermodynamics, CAS Research/Education Center for Excellence in Molecular Sciences, Center for Carbon Neutral Chemistry, Institute of Chemistry, Chinese Academy of Sciences, Beijing 100190, China

<sup>c</sup> Hangzhou Tomato Environmental Protection Technology Co., Ltd., Hangzhou 315000, Zhejiang, China

<sup>d</sup> Department of Chemistry, College of Science, King Saud University, Riyadh-11451, Saudi Arabia

Table S-1: Elemental analysis showing the atomic mass percent of raw materials and biochars.

|     | COS          |              |              |              | COC          |              |              |              |
|-----|--------------|--------------|--------------|--------------|--------------|--------------|--------------|--------------|
|     | R            | R-BC         | OP-BC        | OP-EH-BC     | R            | R-BC         | OP-BC        | OP-EH-BC     |
| C   | <b>59.97</b> | <b>74.77</b> | <b>74.44</b> | <b>53.32</b> | <b>61.95</b> | <b>55.66</b> | <b>75.89</b> | <b>65.58</b> |
| O   | <b>39.11</b> | <b>20.99</b> | <b>24.15</b> | <b>36.95</b> | <b>37.17</b> | <b>32.97</b> | <b>22.18</b> | <b>27.80</b> |
| S   | 0.04         | 0.08         | 0.05         | 0.07         | 0.06         | 0.49         | 0.11         | 0.14         |
| P   | 0.08         | 0.10         | 0.05         | 0.04         | 0.09         | 1.46         | 0.30         | 0.16         |
| Cl  | 0.06         | 0.07         | 0.01         | 0.05         | 0.02         | 0.07         | 0.02         | 0.02         |
| Si  | 0.1          | 0.03         | 0.04         | 0.04         | 0.05         | 0.02         | 0.01         | 0.02         |
| Na  | 0.26         | 0.05         | 0.03         | 7.71         | 0.19         | 0.04         | 0.05         | 4.61         |
| K   | 0.04         | 2.88         | 0.72         | 0.88         | 0.12         | 6.31         | 0.70         | 0.67         |
| Mg  | 0.16         | 0.17         | 0.06         | 0.02         | 0.18         | 1.49         | 0.16         | 0.05         |
| Ca  | 0.02         | 0.57         | 0.44         | 0.83         | 0.02         | 0.63         | 0.43         | 0.80         |
| Al  | 0.43         | 0.20         | 0.08         | 0.08         | 0.13         | 0.76         | 0.20         | 0.10         |
| Mn  | 0            | 0.11         | 0.03         | 0.02         | 0.01         | 0.08         | 0.01         | 0.02         |
| O/C | <b>0.65</b>  | <b>0.28</b>  | <b>0.32</b>  | <b>0.69</b>  | <b>0.60</b>  | <b>0.59</b>  | <b>0.29</b>  | <b>0.42</b>  |

COS: *Camellia oleifera* shell (COS); COC: *C. oleifera* cake; R: raw; OP: oxalic acid pretreatment;

EH: enzymatic hydrolysis; BC: biochar

## Material balance

In this study, three biochar (BC) production routes were employed (Fig. 6a). In Route 1, the raw material (R) was directly converted into biochar (R-BC). In Route 2, the biomass underwent oxalic acidic pretreatment (OP) to produce fermentable sugars, and the resulting solid residues were used for BC fabrication (OP-BC). For Route 3, the biomass was pretreated, and the sugar-containing hydrolysate was preserved. The solid residue was then utilized in an enzymatic hydrolysis (EH) process to further produce sugars. Finally, the residual solids from the EH were subjected to pyrolysis for BC production (OP-EH-BC). Calculations of residual solid percentage, as well as sugar and biochar yields, are provided in the Eqs. S-1 and S-2.

$$\text{Solid residue (\%)} = \frac{\text{solid residue (g)}}{\text{initial substrate (g)}} \times 100$$

S-1

$$\text{Product yield} = \frac{\text{product content (g)}}{\text{initial substrate content (kg)}}$$

S-2

## Higher heating value

The fundamental thermal characteristic of biomass materials, specifically their higher heating value (HHV), is a decisive factor in evaluating their energy potential.<sup>1</sup> Prior to utilizing them as fuel sources, accurate determination of HHV is paramount. However, empirically measuring HHV through methods like bomb calorimetry can be expensive and time-consuming.<sup>2</sup> To streamline this process, alternative, cost-effective techniques for HHV estimation are often sought after. Various mathematical models exist, with HHV estimates based on different analyses, such as ultimate,

proximate, structural, physical, and chemical <sup>1</sup>. HHV derived from ultimate analysis provides more detailed insights due to biomass fuel's elemental composition compared to proximate data.<sup>1,3</sup>

This study evaluates eqs. S-3 to S-8 for an accurate fit, with a comparison of HHV results from previous works shown in Table S-2. Eq. S-3 emerged as the preferred method for the study. To estimate the HHV of biomass and BC materials, a series of equations were sourced from recent comprehensive review articles.<sup>1</sup> These equations take into account the elemental composition, particularly the percentage of carbon (C), oxygen (O), and sulfur (S), in order to provide a theoretically derived estimate of the energy content, a crucial step in optimizing their use as fuel alternatives. By leveraging the findings from these studies, the process of HHV determination becomes more accessible and less reliant on expensive experimental techniques. The results indicate that the BCs produced comparable or higher HHV values than reference materials (Table S-2). For instance, with HHVs of 26.49, 27.68, and 28.21 MJ/kg for COS-R-BC, COS-OP-BC, and COC-OP-BC respectively, they demonstrate potential as bioenergy resources. Chaturvedi's earlier study, which reported HHVs of 23–28 MJ/kg for BCs derived from eucalyptus, lantana, and pine needle, classified them as renewable solid fuels,<sup>4</sup> further highlighting their viability.

$$HHV = 0.4373C - 1.6701 \quad \text{S-3}$$

$$HHV = -0.2413O + 28.9963 \quad \text{S-4}$$

$$HHV = -3.3972S + 18.1625 \quad \text{S-5}$$

$$HHV = -0.0769C - 0.3116O + 35.8357 \quad \text{S-6}$$

$$HHV = 0.2425C + 0.6280S + 6.4386 \quad \text{S-7}$$

$$HHV = -0.2523O + 0.7759S + 29.4066 \quad \text{S-8}$$

Where HHV, C, O, and S represent higher heating value and elemental weight percent of carbon, oxygen, and sulfur, respectively. Equations were collected from recent review study.

Table S-2: Higher heating values (MJ/kg) of the raw materials and biochars from this research and previous literature studies.

| Biomass/biochar          | Equations    |       |       |       |       |       | Experimental |
|--------------------------|--------------|-------|-------|-------|-------|-------|--------------|
|                          | S-3          | S-4   | S-5   | S-6   | S-7   | S-8   |              |
| COS-R                    | 21.31        | 17.98 | 17.62 | 17.57 | 19.28 | 18.01 | NA           |
| COS-R-BC                 | <b>26.49</b> | 23.19 | 17.55 | 23.38 | 22.17 | 23.47 | NA           |
| COS-OP-BC                | <b>27.68</b> | 22.00 | 17.75 | 21.64 | 22.79 | 22.19 | NA           |
| COS-OP-BC                | 17.17        | 19.40 | 17.69 | 20.13 | 16.97 | 19.48 | NA           |
| COC-R                    | 22.18        | 18.45 | 17.62 | 18.02 | 19.76 | 18.50 | NA           |
| COC-R-BC                 | 16.67        | 21.01 | 14.80 | 22.30 | 17.23 | 21.83 | NA           |
| COC-OP-BC                | <b>28.21</b> | 22.58 | 17.24 | 22.29 | 23.18 | 22.90 | NA           |
| COC-OP-BC                | 22.70        | 21.40 | 17.11 | 21.74 | 20.15 | 21.70 | NA           |
| COS-R <sup>5</sup>       | <b>18.97</b> | 17.72 | 17.58 | 17.64 | 17.99 | 17.75 | <b>18.21</b> |
| COS-BC-Py <sup>5</sup>   | <b>30.28</b> | 23.32 | 17.35 | 22.88 | 24.31 | 23.65 | <b>27.22</b> |
| COS-BC-Tor <sup>5</sup>  | <b>28.00</b> | 22.37 | 17.58 | 22.06 | 23.00 | 22.61 | <b>25.51</b> |
| COS-R <sup>6</sup>       | <b>21.11</b> | 19.67 | 17.31 | 19.79 | 19.23 | 19.85 | <b>18.16</b> |
| COS-BC <sup>6</sup>      | <b>23.69</b> | 24.95 | 17.72 | 26.15 | 20.58 | 25.27 | <b>23.25</b> |
| Wood waste <sup>2</sup>  | <b>19.21</b> | 18.97 | 17.79 | 19.21 | 18.09 | 19.01 | <b>19.26</b> |
| Paper waste <sup>2</sup> | <b>17.14</b> | 19.10 | 17.48 | 19.75 | 16.99 | 19.22 | <b>17.08</b> |

COS: *Camellia oleifera* shell (COS); COC: *C. oleifera* cake; R: raw; OP: oxalic acid pretreatment;

EH: enzymatic hydrolysis; BC: biochar; NA: not applicable; Py: pyrolysis; Tor: torrefaction

Table S-3: Assessment of the current study based on the 12 Principles of Green Chemistry.<sup>7-9</sup>

| SN | Principles                     | Description                                                                                               | This study                                                                                                                                                           |
|----|--------------------------------|-----------------------------------------------------------------------------------------------------------|----------------------------------------------------------------------------------------------------------------------------------------------------------------------|
| 1  | Prevention of waste            | Avoid waste generation rather than treating it at the end of the process                                  | The solid residue resulting from biomass hydrolysis, often regarded as waste, was transformed into biochar.                                                          |
| 2  | Atom economy                   | Maximize incorporation of reactants into the targeted products                                            | Routes 2 and 3 showed significantly higher product yields compared to Route 1 (refer to Section 3.3, Material Balance).                                              |
| 3  | Less hazardous/toxic materials | Designs production processes with little or no toxicity to protect the environment and lower health risks | Biomass materials were employed, along with milder reaction conditions.                                                                                              |
| 4  | Safer products                 | Synthesize products with the same desired function, but with less toxicity                                | The fermentable sugar and the biochar are nontoxic.                                                                                                                  |
| 5  | Safer solvents and auxiliaries | Avoid or use less toxic solvents and purification agents should be avoided                                | A relatively small but eco-friendly solvent (oxalic acid) was used, derived from renewable sources and designed for efficient recovery/recycling during the process. |
| 6  | Energy efficiency              | Minimize the energy expense of the process                                                                | Mild reaction conditions: pretreatment at 121°C for 30 min, enzymatic hydrolysis at 50°C for 24 h, and pyrolysis at 400°C for 3 h,                                   |
| 7  | Renewable feedstocks           | Prioritize the use of renewable or biomass-derived feedstock                                              | Camellia oil refinery waste biomass was strategically employed as a sustainable feedstock in the process.                                                            |
| 8  | Derivatives reduction          | Avoid generation of unnecessary derivatives                                                               | The process aimed to minimize generation of unnecessary byproducts, focusing on straightforward, targeted procedures that produced desired                           |

|    |                                               |                                                                                                   |                                                                                                                                                                                                              |
|----|-----------------------------------------------|---------------------------------------------------------------------------------------------------|--------------------------------------------------------------------------------------------------------------------------------------------------------------------------------------------------------------|
|    |                                               |                                                                                                   | outcomes directly from biomass.                                                                                                                                                                              |
| 9  | Catalytic better than stoichiometric reagents | Catalysis for more efficient, selective, and minimization of waste                                | Biocatalysis using enzymes produced through solid-state fermentation was employed, replacing the need for commercial enzymes or other catalysts.                                                             |
| 10 | Product design for degradation                | Synthesize degradable products into nontoxic materials at the end-of-life                         | The fermentable sugars and biochars were designed with biodegradability in mind, ensuring that even their derived application products would contribute to a more environmentally friendly cycle.            |
| 11 | Real-time analysis for pollution reduction    | Instant, in situ monitoring and control of substances before the formation of hazardous materials | The analytical techniques employed in this research are carefully vetted, adhering to safety protocols and following established, standardized procedures, as detailed in the Materials and Methods section. |
| 12 | Safer process for accident prevention         | Select inherently safer chemicals to prevent incidents                                            | In this study, an emphasis on safety and environmental responsibility was evident, with the use of green alternatives like oxalic acid instead of harsh mineral acids or hazardous substances.               |

## References

1. A. S. Noushabadi, A. Dashti, F. Ahmadijokani, J. Hu and A. H. Mohammadi, *Renew. Energy*, 2021, **179**, 550-562.
2. A. Dashti, A. S. Noushabadi, J. Asadi, M. Raji, A. G. Chofreh, J. J. Klemeš and A. H. Mohammadi, *Renew. Sustain. Energy Rev.*, 2021, **151**, 111591.
3. D. R. Nhuchhen and P. Abdul Salam, *Fuel*, 2012, **99**, 55-63.
4. S. Chaturvedi, S. V. Singh, V. C. Dhyani, K. Govindaraju, R. Vinu and S. Mandal, *Biomass Conv. Bioref.*, 2023, **13**, 879-892.
5. F. Fan, Y. Zheng, Y. Huang, Y. Lu, Z. Wang, B. Chen and Z. Zheng, *Energy Fuels*, 2017, **31**, 8146-8151.
6. S.-R. Wu, C.-C. Chang, Y.-H. Chang and H.-P. Wan, *Fuel*, 2016, **175**, 57-63.
7. P. T. Anastas and J. C. Warner, *Green Chemistry: Theory and Practice*, Oxford University Press, 1998.
8. V. Hessel, M. Escribà-Gelonch, J. Bricout, N. N. Tran, A. Anastasopoulou, F. Ferlin, F. Valentini, D. Lanari and L. Vaccaro, *ACS Sustain. Chem. Eng.*, 2021, **9**, 9508-9540.
9. P. Anastas and N. Eghbali, *Chem. Soc. Rev.*, 2010, **39**, 301-312.
